# Supplementary material
Source: publisher figshare collection journal article supplement (https://frontiersin.figshare.com/ndownloader/files/15367850)
Supplement: Supplementary file 1 [file 15367850]

| **Supplementary Table 1. Details for each transect included in the present study.** NNE = North Northeast, PL = Plantagenet Bank, SP = Spittal, TIG = Tiger, DIV = Divers, SUB = Submersibles. | | | | | | | |
| --- | --- | --- | --- | --- | --- | --- | --- |
| **Site** | **Transect** | **Depth (m)** | **Assigned Depth (m)** | **Lat (°N)** | **Long (°W)** | **Date** | **Sampling method** |
| NNE | NNE_15_1 | 18‒20 | 15 | 32.49670 | 64.63062 | 23.07.2016 | DIV |
| NNE | NNE_15_2 | 18‒20 | 15 | 32.49688 | 64.63064 | 23.07.2016 | DIV |
| NNE | NNE_30_1 | 31 | 30 | 32.50106 | 64.62240 | 23.07.2016 | DIV |
| NNE | NNE_30_2 | 31 | 30 | 32.50106 | 64.62240 | 23.07.2016 | DIV |
| NNE | NNE_30_3 | 30 | 30 | 32.47993 | 64.59480 | 28.07.2016 | DIV |
| NNE | NNE_30_4 | 30 | 30 | 32.47993 | 64.59481 | 28.07.2016 | DIV |
| NNE | NNE_60_1 | 60 | 60 | 32.50350 | 64.62138 | 23.07.2016 | DIV |
| NNE | NNE_60_2 | 60 | 60 | 32.50352 | 64.62115 | 23.07.2016 | DIV |
| NNE | NNE_60_3 | 60 | 60 | 32.50357 | 64.62119 | 23.07.2016 | DIV |
| NNE | NNE_60_4 | 60 | 60 | 32.50357 | 64.62119 | 23.07.2016 | DIV |
| NNE | NNE_90_1 | 90‒92 | 90 | 32.48270 | 64.58753 | 29.07.2016 | DIV |
| NNE | NNE_90_2 | 90‒93 | 90 | 32.48290 | 64.58795 | 29.07.2016 | DIV |
| NNE | NNE_150_1 | 145‒146 | 150 | 32.50242 | 64.61678 | 23.07.2016 | SUB |
| NNE | NNE_150_2 | 137‒139 | 150 | 32.50000 | 64.61389 | 23.07.2016 | SUB |
| NNE | NNE_150_3 | 136‒139 | 150 | 32.49727 | 64.61040 | 23.07.2016 | SUB |
| NNE | NNE_200_1 | 195‒200 | 200 | 32.47653 | 64.57436 | 06.08.2016 | SUB |
| NNE | NNE_200_2 | 198-200 | 200 | 32.47427 | 64.57586 | 06.08.2016 | SUB |
| NNE | NNE_200_3 | 147‒151 | 200 | 32.47301 | 64.57492 | 06.08.2016 | SUB |
| NNE | NNE_250_1 | 249‒252 | 250 | 32.48610 | 64.58348 | 29.07.2016 | SUB |
| NNE | NNE_250_2 | 250 | 250 | 32.48162 | 64.58018 | 29.07.2016 | SUB |
| NNE | NNE_250_3 | 250 | 250 | 32.47918 | 64.57751 | 29.07.2016 | SUB |
| NNE | NNE_300_1 | 299‒303 | 300 | 32.48507 | 64.58639 | 28.07.2016 | SUB |
| NNE | NNE_300_2 | 300‒301 | 300 | 32.48408 | 64.58590 | 28.07.2016 | SUB |
| NNE | NNE_300_3 | 299‒301 | 300 | 32.48420 | 64.58085 | 28.07.2016 | SUB |
| PL | PL_60_1 | 55 | 60 | 31.94990 | 65.17762 | 12.08.2016 | DIV |
| PL | PL_60_2 | 55 | 60 | 31.94990 | 65.17762 | 12.08.2016 | DIV |
| PL | PL_90_1 | 90 | 90 | 31.93223 | 65.18228 | 24.07.2016 | DIV |
| PL | PL_90_2 | 90 | 90 | 31.93176 | 65.18395 | 24.07.2016 | DIV |
| PL | PL_90_3 | 92‒94 | 90 | 31.94485 | 65.15687 | 25.07.2017 | DIV |
| PL | PL_90_4 | 90‒91 | 90 | 31.94485 | 65.15687 | 25.07.2017 | DIV |
| PL | PL_200_1 | 186‒187 | 200 | 31.94236 | 65.15640 | 24.07.2016 | SUB |
| PL | PL_200_2 | 185‒201 | 200 | 31.93959 | 65.15924 | 24.07.2016 | SUB |
| PL | PL_250_1 | 249 | 250 | 31.94244 | 65.15490 | 13.08.2016 | SUB |
| PL | PL_250_2 | 250 | 250 | 31.94005 | 65.15899 | 13.08.2016 | SUB |
| PL | PL_250_3 | 249 | 250 | 31.94044 | 65.16281 | 13.08.2016 | SUB |
| PL | PL_300_1 | 297‒302 | 300 | 31.93952 | 65.15695 | 25.07.2016 | SUB |
| PL | PL_300_2 | 303 | 300 | 31.93754 | 65.16184 | 25.07.2016 | SUB |
| PL | PL_300_3 | 303 | 300 | 31.93549 | 65.16432 | 25.07.2016 | SUB |
| SP | SP_30_1 | 31 | 30 | 32.32199 | 64.66255 | 27.07.2016 | DIV |
| SP | SP_60_1 | 58 | 60 | 32.32013 | 64.65778 | 03.08.2016 | DIV |
| SP | SP_60_2 | 63 | 60 | 32.32019 | 64.65791 | 03.08.2016 | DIV |
| SP | SP_150_1 | 143‒148 | 150 | 32.31531 | 64.65983 | 04.08.2016 | SUB |
| SP | SP_150_2 | 148‒153 | 150 | 32.31566 | 64.65677 | 07.08.2016 | SUB |
| SP | SP_150_3 | 148‒150 | 150 | 32.31638 | 64.65813 | 07.08.2016 | SUB |
| SP | SP_200_1 | 200 | 200 | 32.32023 | 64.65523 | 26.07.2016 | SUB |
| SP | SP_200_2 | 200‒202 | 200 | 32.31727 | 64.65538 | 26.07.2016 | SUB |
| SP | SP_200_3 | 199‒200 | 200 | 32.31415 | 64.65817 | 26.07.2016 | SUB |
| SP | SP_250_1 | 250 | 250 | 32.32042 | 64.65473 | 04.08.2016 | SUB |
| SP | SP_250_2 | 248‒251 | 250 | 32.32090 | 64.65228 | 04.08.2016 | SUB |
| SP | SP_250_3 | 249‒250 | 250 | 32.31372 | 64.65105 | 04.08.2016 | SUB |
| SP | SP_300_1 | 300 | 300 | 32.31645 | 64.65610 | 26.07.2016 | SUB |
| SP | SP_300_2 | 297‒300 | 300 | 32.31600 | 64.65305 | 26.07.2016 | SUB |
| SP | SP_300_3 | 300‒301 | 300 | 32.31130 | 64.65689 | 26.07.2016 | SUB |
| TIG | TIG_15_1 | 17 | 15 | 32.19908 | 64.96763 | 05.08.2016 | DIV |
| TIG | TIG_15_2 | 17 | 15 | 32.19908 | 65.96763 | 05.08.2016 | DIV |
| TIG | TIG_15_3 | 15‒16 | 15 | 32.20356 | 64.9491 | 07.08.2016 | DIV |
| TIG | TIG_15_4 | 15 | 15 | 32.20356 | 64.9491 | 07.08.2016 | DIV |
| TIG | TIG_30_1 | 30 | 30 | 32.20668 | 64.95693 | 05.08.2016 | DIV |
| TIG | TIG_30_2 | 31 | 30 | 32.20668 | 64.95693 | 05.08.2016 | DIV |
| TIG | TIG_30_3 | 28‒29 | 30 | 32.20356 | 64.9491 | 07.08.2016 | DIV |
| TIG | TIG_30_4 | 29‒30 | 30 | 32.20356 | 64.9491 | 07.08.2016 | DIV |
| TIG | TIG_60_1 | 61‒63 | 60 | 32.19253 | 64.96851 | 01.08.2016 | DIV |
| TIG | TIG_60_2 | 61 | 60 | 32.19253 | 64.96851 | 01.08.2016 | DIV |
| TIG | TIG_60_3 | 61-62 | 60 | 32.19253 | 64.96852 | 01.08.2016 | DIV |
| TIG | TIG_60_4 | 62 | 60 | 32.19253 | 64.96852 | 01.08.2016 | DIV |
| TIG | TIG_90_1 | 90 | 90 | 32.19355 | 64.96732 | 05.08.2016 | DIV |
| TIG | TIG_90_2 | 93 | 90 | 32.19355 | 64.96732 | 05.08.2016 | DIV |
| TIG | TIG_90_4 | 90 | 90 | 32.20356 | 64.9491 | 07.08.2016 | DIV |
| TIG | TIG_90_5 | 90 | 90 | 32.20356 | 64.9491 | 07.08.2016 | DIV |
| TIG | TIG_150_1 | 139‒149 | 150 | 32.17966 | 64.98632 | 12.08.2016 | SUB |
| TIG | TIG_200_1 | 198‒200 | 200 | 32.17911 | 64.98655 | 12.08.2016 | SUB |
| TIG | TIG_200_2 | 200 | 200 | 32.18020 | 64.98125 | 12.08.2016 | SUB |
| TIG | TIG_200_3 | 200 | 200 | 32.18111 | 64.98365 | 12.08.2016 | SUB |
| TIG | TIG_250_1 | 241 | 250 | 32.19195 | 64.96690 | 05.08.2016 | SUB |
| TIG | TIG_250_2 | 243 | 250 | 32.19118 | 64.96963 | 05.08.2016 | SUB |
| TIG | TIG_250_3 | 242 | 250 | 32.18755 | 64.96820 | 05.08.2016 | SUB |
| TIG | TIG_300_1 | 304 | 300 | 32.18092 | 64.97687 | 12.08.2016 | SUB |
| TIG | TIG_300_2 | 304‒305 | 300 | 32.18166 | 64.98057 | 12.08.2016 | SUB |
| TIG | TIG_300_3 | 304‒305 | 300 | 32.17820 | 64.98377 | 12.08.2016 | SUB |
|  |  |  |  |  |  |  |  |
| **Depth (m)** | **Site** | | | | **N of transects per Depth** |  |  |
|  | NNE | PL | SP | TIG |  |  |  |
| 15 | 2 |  |  | 4 | 6 |  |  |
| 30 | 4 |  | 1 | 4 | 9 |  |  |
| 60 | 4 | 2 | 2 | 4 | 12 |  |  |
| 90 | 2 | 4 |  | 4 | 10 |  |  |
| 150 | 3 | 0 | 3 | 1 | 7 |  |  |
| 200 | 3 | 2 | 3 | 3 | 11 |  |  |
| 250 | 3 | 3 | 3 | 3 | 12 |  |  |
| 300 | 3 | 3 | 3 | 3 | 12 |  |  |
| **N transects per Site** | 24 | 14 | 15 | 26 |  |  |  |
